# Supplementary material for: Ring cell migration assay identifies distinct effects of extracellular matrix proteins on cancer cell migration
Source: PubMed Central journal article supplement (PMC3986826; doi:10.1186/1756-0500-7-183), 2014-03-27
Supplement: 1756-0500-7-183-S1.pdf [file 1756-0500-7-183-S1.pdf]

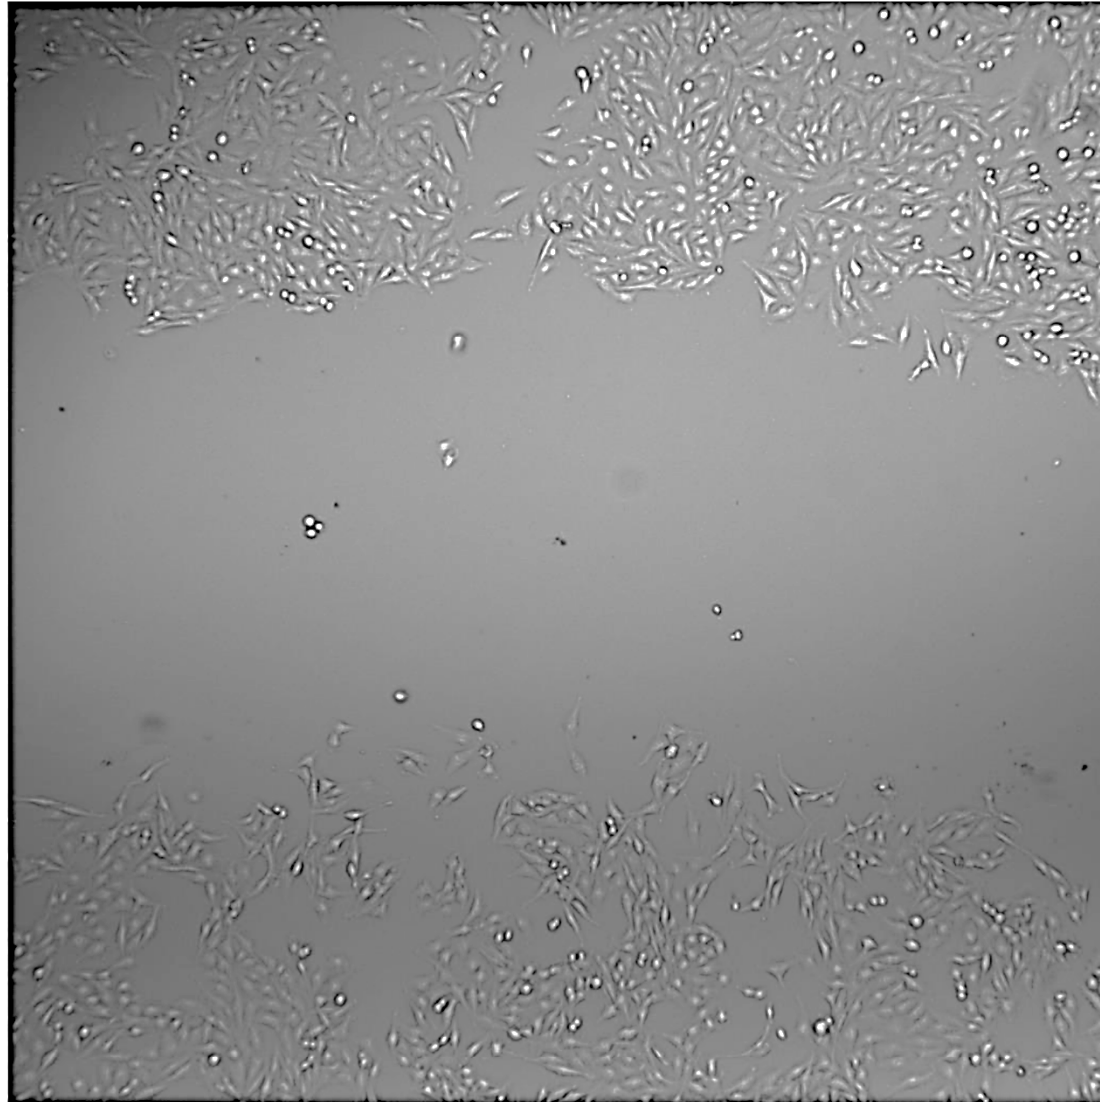

Supplementary Figure 1 – Representation of the gap of the U251N glioma cells at 24h after removal of the cloning ring
