# Supplementary material for: Ring cell migration assay identifies distinct effects of extracellular matrix proteins on cancer cell migration
Source: PubMed Central journal article supplement (PMC3986826; doi:10.1186/1756-0500-7-183), 2014-03-27
Supplement: 1756-0500-7-183-S2.pdf [file 1756-0500-7-183-S2.pdf]

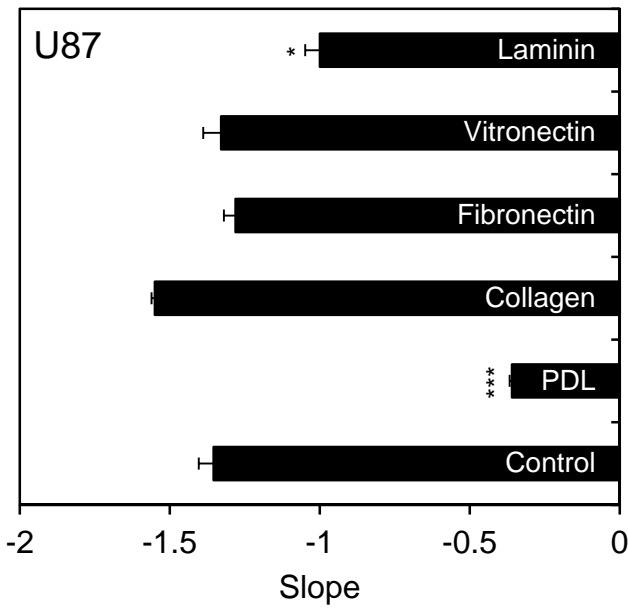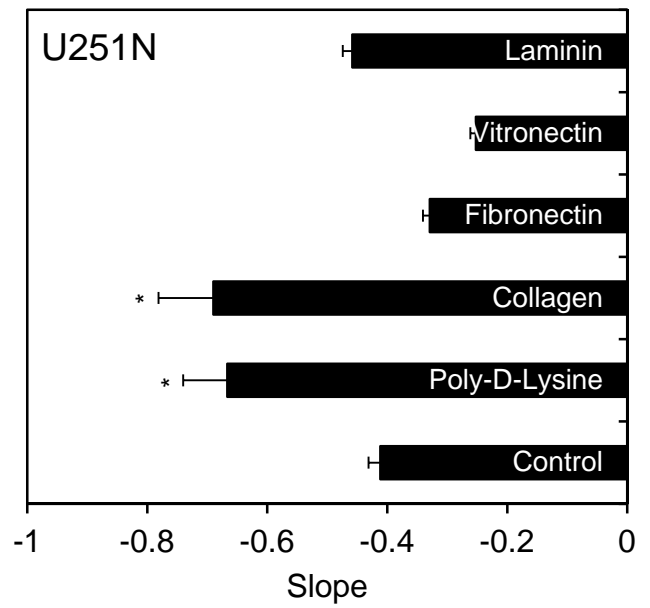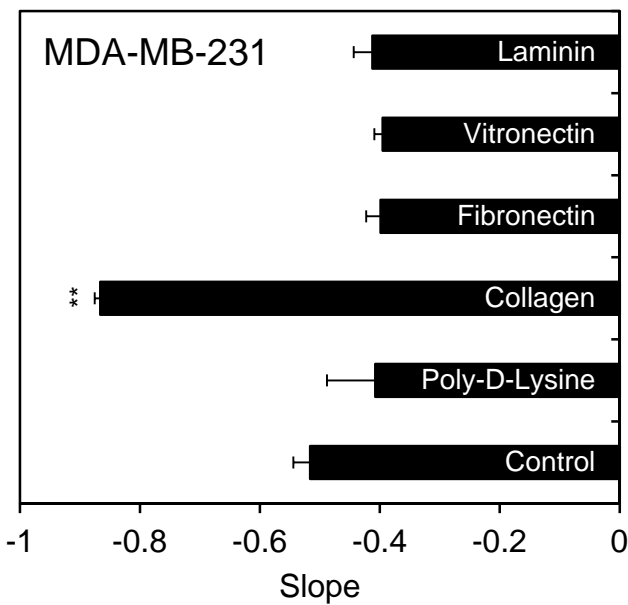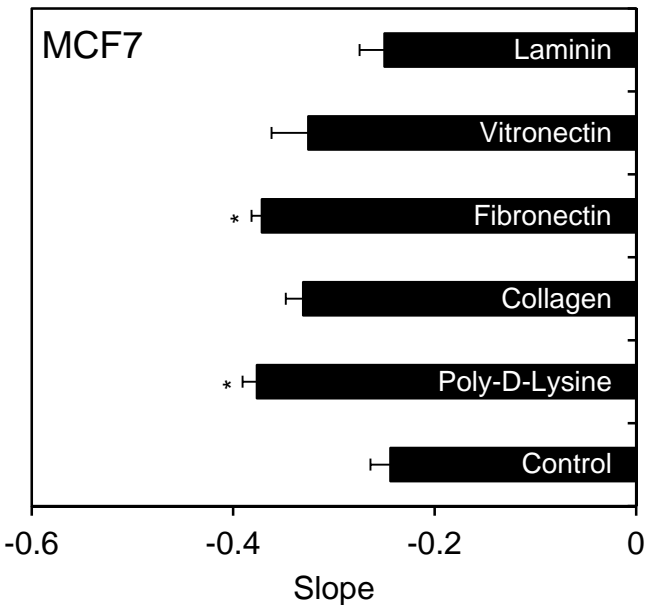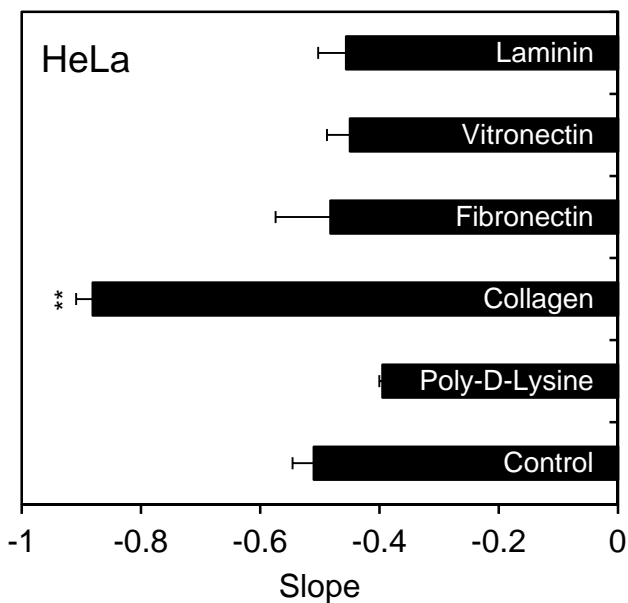

Supplementary Figure 2 - Slope as an indicator of distinct effects of extracellular matrixes on cell migration. U87, U251N, MDA-MB231, MCF7 and HeLa cells grown on indicated extracellular matrixes were performed with ring cell migration assay and the slope were measured from Figure 5. One-way ANOVA Dunnett's Multiple Comparison Test: Compare all columns vs. Control, N = 2. \*\* p<0.001, \*\* p<0.01 and \* p<0.05.
